# Supplementary material for: Social Feedback and the Emergence of Rank in Animal Society
Source: PubMed Central journal article supplement (PMC4565698; doi:10.1371/journal.pcbi.1004411), 2015-09-10
Supplement: pcbi.1004411.s009.pdf [file pcbi.1004411.s009.pdf]

# Supporting Information: Social Feedback and the Emergence of Rank in Animal Society

Elizabeth A. Hobson & Simon DeDeo

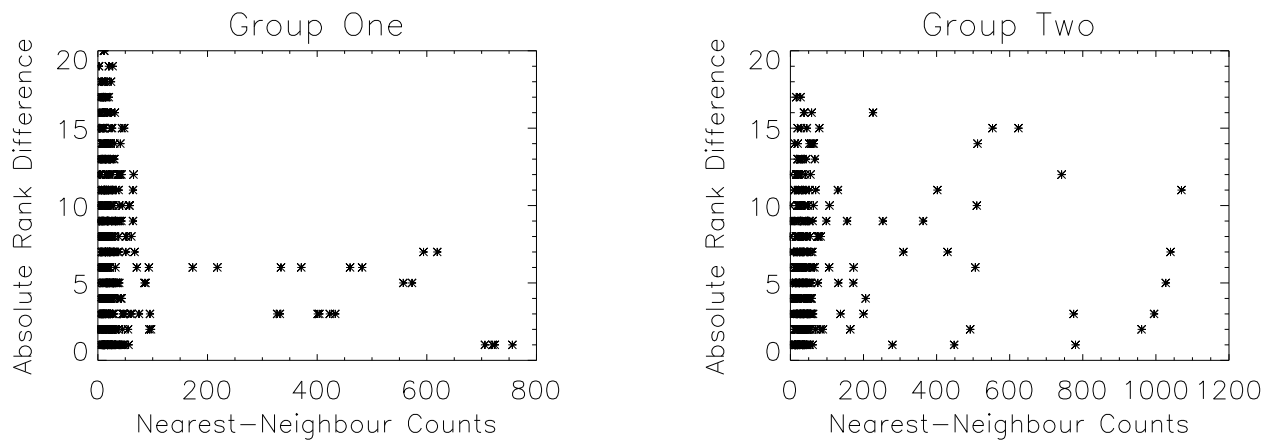

**S4 Fig. Neighbor identity is not a strong signal of rank.** Spatial proximity (via neighbor identity) is not a strong signal of rank in either Group One ( $r^2 = -0.12$ ) or Group Two ( $r^2 = -0.02$ ). Even in the final three-quarters, where behavior is most regular, in Group One, proximity provides only a weakly anticorrelated signal ( $r^2 = -0.14$ ); in Group Two, it provides no signal at all ( $r^2 = 0.04$ ; consistent with null). Note that each point here represents a pair; there are thus 210 points in Group One and 171 points in Group Two on these two plots, with the vast majority of points overlapping near zero on the  $x$  axis.
