# Supplementary material for: Social Feedback and the Emergence of Rank in Animal Society
Source: PubMed Central journal article supplement (PMC4565698; doi:10.1371/journal.pcbi.1004411), 2015-09-10
Supplement: pcbi.1004411.s011.pdf [file pcbi.1004411.s011.pdf]

# Supporting Information: Social Feedback and the Emergence of Rank in Animal Society

Elizabeth A. Hobson & Simon DeDeo

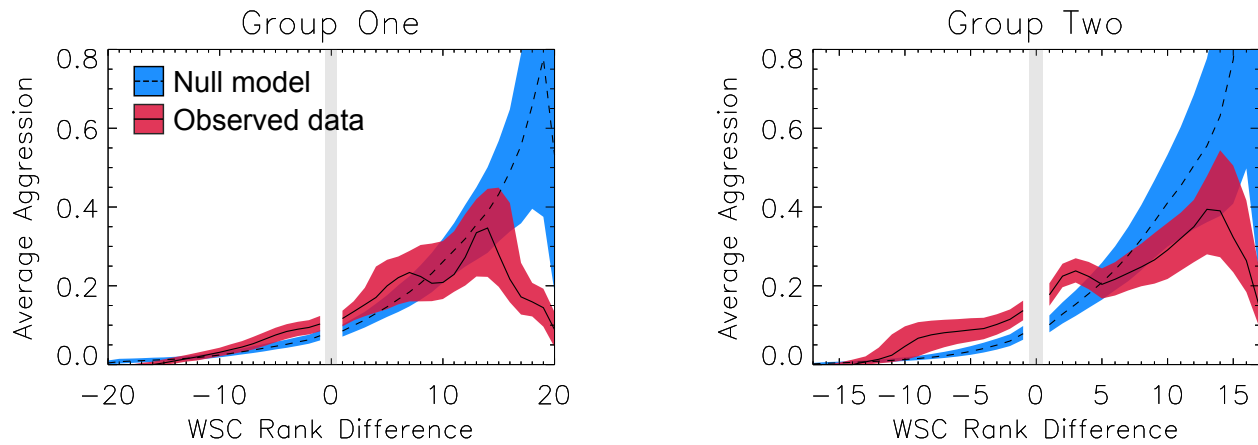

**S6 Fig. Weighted Simple Consensus as a guide to focused aggression.** Aggression patterns plotted for the final three study quarters. Red band is average aggression as a function of rank difference (and  $1\sigma$  errors); blue is the EC null as before.
