# Supplementary material for: Social Feedback and the Emergence of Rank in Animal Society
Source: PubMed Central journal article supplement (PMC4565698; doi:10.1371/journal.pcbi.1004411), 2015-09-10
Supplement: pcbi.1004411.s012.pdf [file pcbi.1004411.s012.pdf]

# Supporting Information: Social Feedback and the Emergence of Rank in Animal Society

Elizabeth A. Hobson & Simon DeDeo

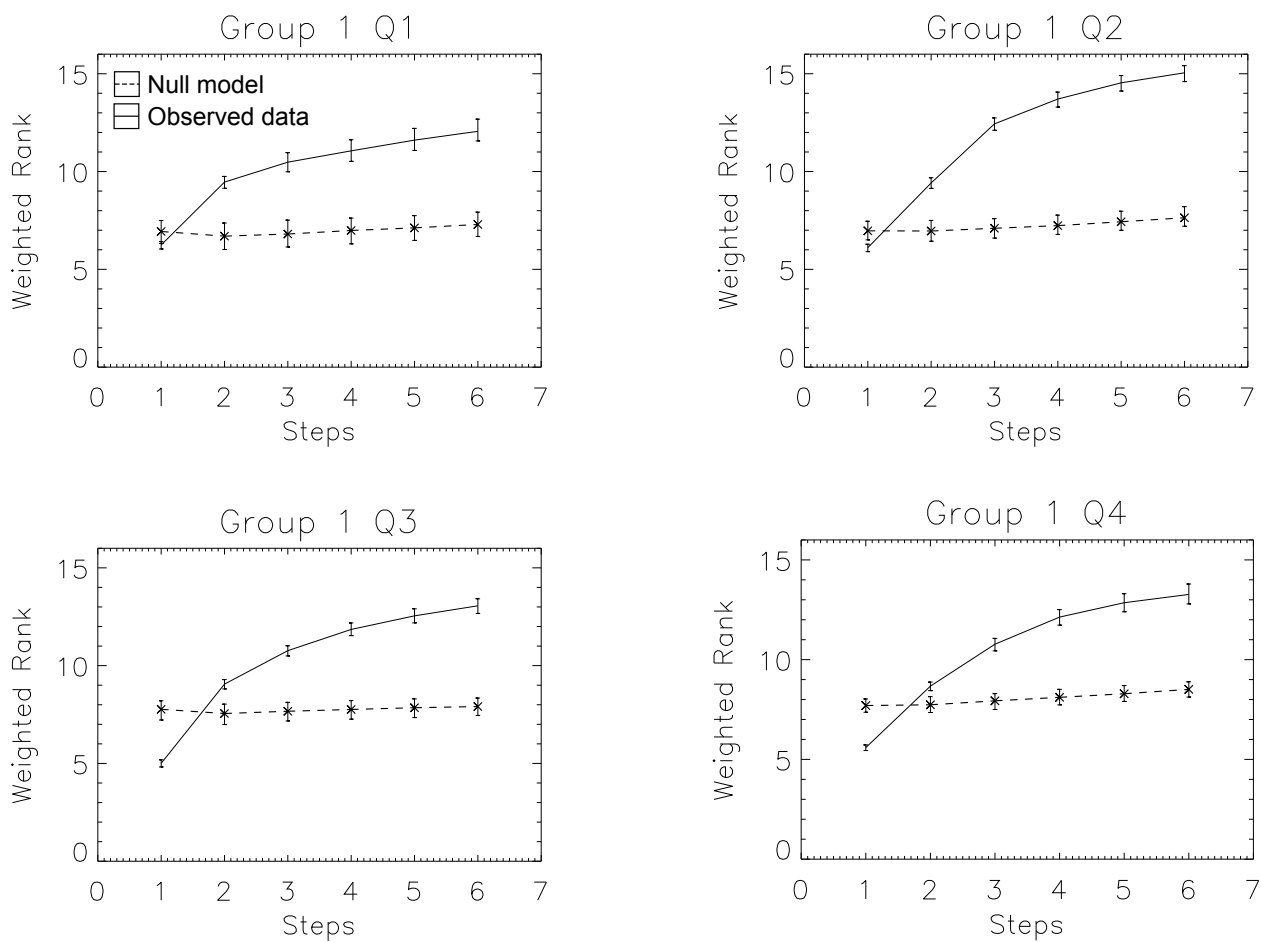

**S7 Fig.**  $W(n)$  broken out quarter-by-quarter for Group One. Transitive signals of rank already appear in Quarter One, where the one- and two-step aggression chains can clearly distinguish relative ranks. In Quarters Two, Three and Four, these signals strengthen, so that three- and even four-step aggression chains now contain additional information.
